# Supplementary material
Source: PubMed Central journal article supplement (PMC4787960)
Supplement: ruij783951.w1_default.pdf [file ruij783951.w1_default.pdf]

## **Web appendix: The Prospective Epidemiological Study of Myocardial Infarction (PRIME) group**

The PRIME study is organized under an agreement between INSERM and the Merck, Sharpe & Dohme-Chibret Laboratory, with the following participating laboratories:

- The Strasbourg MONICA Project, Laboratoire d'Epidémiologie et de Santé Publique, EA 3430, Strasbourg, F-67085, France; and Université de Strasbourg, Strasbourg, F-67085, France (D. Arveiler, B. Haas)
- The Toulouse MONICA Project, INSERM U558; and Department of Epidemiology, Université Paul Sabatier - Toulouse Purpan, Toulouse, France (J. Ferrières, J-B. Ruidavets)
- The Lille MONICA Project, INSERM U744, Lille, France; and Institut Pasteur de Lille, Lille, France; and Université Lille Nord de France, Lille, France (P. Amouyel, M. Montaye)
- The Department of Epidemiology and Public Health, Queen's University, Belfast, Northern Ireland (A. Evans, J. Yarnell, F. Kee)
- The Department of Atherosclerosis, INSERM, U545, Lille; Institut Pasteur de Lille, Lille; and Faculté de Médecine, and Université Lille Nord de France, Lille, France (G. Luc, J-M. Bard)
- The Laboratory of Haematology, INSERM, U626, Marseille, Hôpital La Timone, Marseille, France (I. Juhan-Vague, P. Morange)
- The Laboratory of Endocrinology, INSERM U563, Toulouse, France (B. Perret)
- The Vitamin Research Unit, The University of Bern, Bern, Switzerland (F. Gey)
- The Nutrition and Metabolism Group, Centre for Public Health, Queen's University Belfast, Northern Ireland (J. Woodside, I. Young).
- The DNA Bank, INSERM/UPMC, Paris Universitatis UMRS 937, Paris, F-75013 (F. Cambien)

Coordinating centres:

IFR 69, Villejuif, F-94807, France (P. Ducimetière)

INSERM U970, Villejuif, F-94807, France

University Paris V, Paris Cardiovascular Research Centre (PAARC), Paris, F-75015, France (A. Bingham)
